# Supplementary material for: Is increased sensitivity to punishment a common characteristic of attention deficit/hyperactivity disorder? An experimental study of response allocation in Japanese children
Source: Springer Nature journal article supplement (doi:10.1007/s12402-019-00307-6), 2019-05-16

Supplemental Figure 2. Mean response bias scores and standard errors of Japanese and English-speaking group samples during the first and second blocks of 100 trials. Adjusted for age (107.04) and gender (1.33).


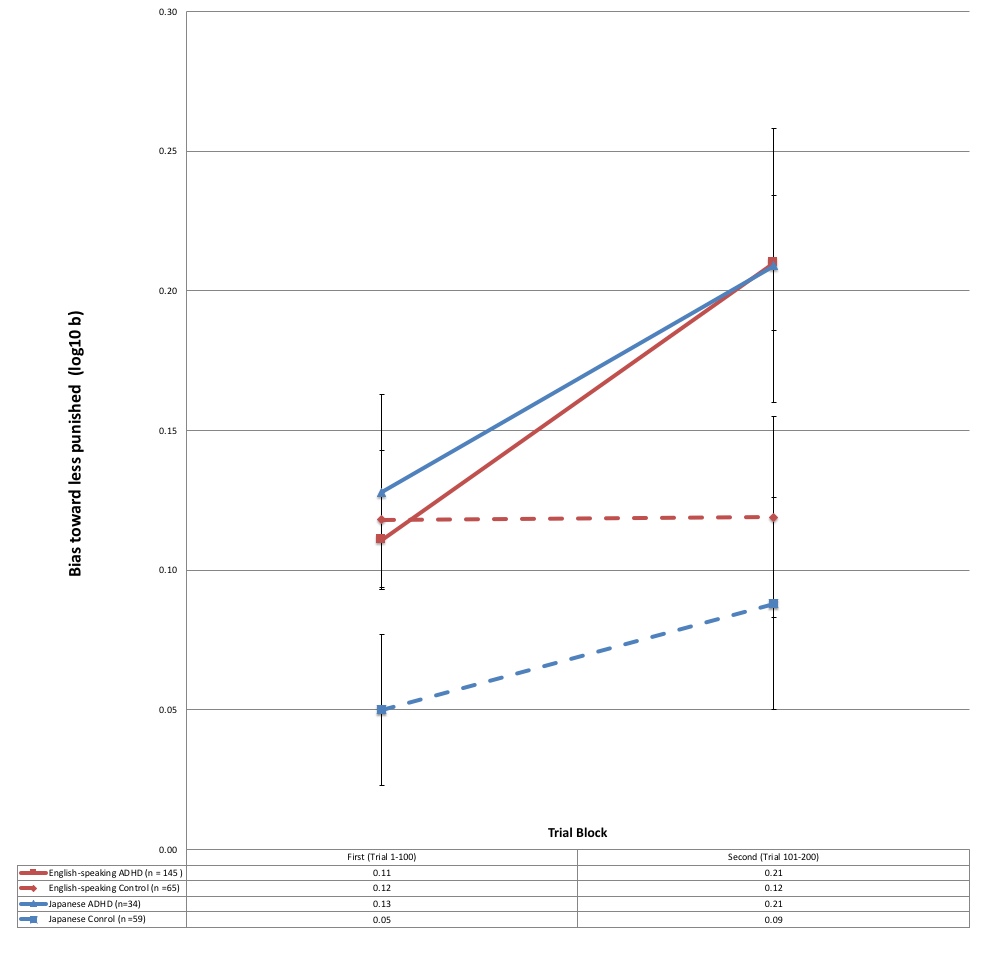

Supplement: MOESM2 [file 16729020]
